1 **Title:**

2 Strategies to support substance use disorder care transitions from acute-care to community-based  
3 settings: A Scoping review and typology

4  
5 **Authors**

6 Noa Krawczyk, PhD,<sup>1</sup> Bianca D. Rivera, MPH,<sup>1</sup> Ji E. Chang, PhD,<sup>2</sup> Margaux Grivel, MA,<sup>3</sup> Yu-  
7 Heng Chen, MSc,<sup>4</sup> MA, Suhas Nagappala, BA<sup>5</sup>, Honora Englander, MD,<sup>6</sup> Jennifer McNeely,  
8 MD, MS<sup>1</sup>

- 9
- 10 1. Department of Population Health, NYU Grossman School of Medicine, New York NY
  - 11 10065
  - 12 2. Department of Public Health Policy and Management, NYU School of Global Public
  - 13 Health, New York NY 10003
  - 14 3. Department of Social and Behavioral Sciences, NYU School of Global Public Health,
  - 15 New York NY 10003
  - 16 4. Department of Criminal Justice, Temple University, Philadelphia, PA 19102
  - 17 5. University of California Berkeley, Berkeley, CA 94720
  - 18 6. Department of Medicine, Oregon Health & Science University, Portland, OR 97239

19  
20  
21 **Corresponding Author**

22 Noa Krawczyk, PhD  
23 Assistant Professor  
24 Center for Opioid Epidemiology and Policy  
25 Department of Population Health  
26 NYU Grossman School of Medicine  
27 180 Madison Ave, New York, Room 4-12  
28 (914) 629-6796  
29 [noa.krawczyk@nyulangone.org](mailto:noa.krawczyk@nyulangone.org)

30  
31

1 **Abstract**

2

3 **Background:** Acute-care interventions that identify patients with substance use disorders  
4 (SUDs), initiate treatment, and link patients to community-based services, have proliferated in  
5 recent years. Yet, much is unknown about the specific strategies being used to support  
6 continuity of care from emergency department (ED) or inpatient hospital settings to community-  
7 based SUD treatment. In this scoping review, we synthesize the existing literature on patient  
8 transition interventions, and form an initial typology of reported strategies.

9 **Methods:** We searched Pubmed, Embase, CINAHL and PsychINFO for peer-reviewed articles  
10 published between 2000-2021 that studied interventions linking SUD patients from ED or  
11 inpatient hospital settings to community-based SUD services. Eligible articles measured at least  
12 one post-discharge treatment outcome and included a description of the strategy used to promote  
13 linkage to community care. Detailed information was extracted on the components of the  
14 transition strategies and a thematic coding process was used to categorize strategies into a  
15 typology based on shared characteristics. Facilitators and barriers to transitions of care were  
16 synthesized using the Consolidated Framework for Implementation Research.

17 **Results:** Forty-five articles met inclusion criteria. 62% included ED interventions and 44%  
18 inpatient interventions. The majority focused on patients with opioid (71%) followed by alcohol  
19 (31%) use disorder. The transition strategies reported across studies were heterogeneous and  
20 often not well described. An initial typology of ten transition strategies, including five pre- and  
21 five post-discharge transition strategies is proposed. The most common strategy was scheduling  
22 an appointment with a community-based treatment provider prior to discharge. A range of  
23 facilitators and barriers were described, which can inform efforts to improve hospital-to-  
24 community transitions of care.

25 **Conclusions:** Strategies to support transitions from acute-care to community-based SUD  
26 services, although critical for ensuring continuity of care, vary greatly across interventions and  
27 are inconsistently measured and described. More research is needed to classify SUD care  
28 transition strategies, understand their components, and explore which lead to the best patient  
29 outcomes.

30

1 **Key Words:** Care transitions; care navigation; warm handoff; substance use disorder; treatment;  
2 hospital; emergency department; acute-care; interventions; opioid use disorder

3

4 **Abbreviations:**

5 **SUD:** Substance use disorder

6 **OD:** Opioid use disorder

7 **MOUD:** Medications for opioid use disorder

8 **ED:** Emergency department

9 **CFIR:** Consolidated framework for implementation research

## 1 **Introduction**

2 In the midst of an ongoing drug overdose crisis, engaging individuals with substance use  
3 disorders (SUDs) in evidence-based treatment and services is an urgent priority. And yet, many  
4 at-risk patient populations with SUD remain largely disconnected from care[1–3]. Opioids  
5 remain the leading cause of overdose death, but an estimated 87% of individuals with opioid use  
6 disorder (OUD) do not access evidence-based treatment with methadone or buprenorphine[4].

7 One approach to address the gap in OUD treatment, and SUD treatment more broadly, has  
8 been to leverage emergency department (ED) and inpatient hospital encounters as potential  
9 “touchpoints” to offer patients with SUD an opportunity to initiate treatment (including  
10 medications for opioid use disorder (MOUD), when appropriate) and link them with ongoing  
11 services in the community[5]. Indeed, a growing body of literature is emerging regarding both  
12 ED [6] and inpatient hospital models [7] to deliver care for SUD patients. These practices  
13 generally involve screening and assessing patients for unhealthy substance use (hazardous use or  
14 SUD), offering a brief intervention and/or initiation of pharmacotherapy, and referring patients to  
15 ongoing treatment upon discharge [8–10] The evidence on the effectiveness of these  
16 interventions in improving linkage to treatment following hospital discharge has been mixed  
17 [11], with interventions offering initiation of MOUD for OUD showing more promise in recent  
18 years [12,13].

19 While SUD interventions have proliferated across acute-care settings, much is still unknown  
20 about the particular practices used to support the transition of patients from the hospital to  
21 community-based care. A recent systematic review of interventions to support SUD patients  
22 upon hospital discharge found great heterogeneity in the settings, approach, and nature of  
23 interventions implemented to achieve this goal, but did not specify how those interventions  
24 delivered transitional care components to support the actual linkage of patients across studies  
25 [10]. Even studies of the widely-adopted substance use intervention Screening, Brief  
26 Intervention, and Referral to Treatment (SBIRT), rarely describe or evaluate practices used to  
27 refer or transition patients to ongoing care [11]. Such “transition strategies” (as we refer to from  
28 now on) are often vaguely described as linkages, discharge planning, care navigation, warm  
29 handoffs, or referrals to community care, but have never been characterized or compared in the  
30 context of hospital patients with SUD. This gap may be in part due to the challenge of comparing  
31 heterogenous interventions and practices that often use vague or inconsistent terminology. As

1 such, more work is needed to explore the ‘black box’ of transition strategies used to support the  
2 ‘Cascade of Care’ [14] from the ED or inpatient setting to ongoing community-based SUD  
3 treatment (Figure 1).

4 Evidence on the most successful transition strategies can help health systems adopt the most  
5 effective and efficient practices to improve SUD outcomes among their patient populations. For  
6 OUD patients, specifically, improving transitions from hospital- to community-based provisions  
7 of care with evidence-based medication for OUD (MOUD) can significantly support patients’  
8 success across the OUD Cascade of Care[15]. However, to do so, more research is needed to  
9 identify and categorize particular SUD care transition strategies, understand and break down  
10 their components, and identify the barriers and facilitators to their implementation and execution.  
11 To begin addressing this gap, the current scoping review aims to: 1) synthesize information from  
12 published literature on existing transition strategies used to link patients with SUDs from ED or  
13 inpatient hospital settings to community-based SUD treatment; 2) Group and classify transition  
14 strategies based on similar characteristics, forming an initial typology of strategies; 3)  
15 Summarize the primary barriers and facilitators encountered in implementing transition strategies  
16 within the studied programs and interventions.

17

18

## 19 **Methods**

20 This scoping review was conducted in alignment with the Preferred Reporting Items of  
21 Systematic Reviews and Meta-Analyses for Scoping Review (PRISMA-ScR) checklist [16], as  
22 available in Supplemental Table 1.

23

### 24 *Search Strategy*

25 An initial search strategy was developed using combinations of keywords related to  
26 SUDs and linkage to community-based SUD treatment from acute-care settings. The search  
27 strategy was further refined in consultation with an expert librarian at the New York University  
28 Health Sciences Library and adapted to the following databases: PubMed, EMBASE via OVID,  
29 CINAHL via EBSCO, and PsycInfo via OVID. The full search strategy for each database can be  
30 found in Supplemental Table 2. The final search was conducted on October 2, 2021. A manual  
31 search of the reference lists of included articles was conducted to capture potentially relevant

1 studies that were not identified by the database search. Lastly, we reviewed the studies included  
2 in a recently published systematic review on acute-care interventions for SUD patients [10] to  
3 ensure a robust inclusion toward our aims.

4

#### 5 *Eligibility Criteria*

6 Articles were included if they (1) were published between January 1, 2000 and October 2,  
7 2021, (2) described programs or interventions for adult patients with SUDs (excluding tobacco)  
8 hospitalized in general acute-care settings (i.e. either ED or inpatient hospital settings, not  
9 including specialized detox or psychiatric inpatient care), (3) evaluated post-hospital SUD  
10 treatment engagement outcomes, and (4) described practices for supporting patients' transition  
11 from the acute-care setting to community SUD treatment. Given the review's primary focus on  
12 characterizing strategies employed to support patients' transition between acute-care to  
13 community SUD settings, the last inclusion criteria required the article to have a minimum of  
14 one sentence describing the transition strategy. Thus, otherwise eligible studies that failed to  
15 include a description of how patients were linked with post-discharge care were not included  
16 (one third of full text studies (n=51), Figure 2). While our search was not limited to English-  
17 language articles, the few non-English studies deemed eligible for full-text review and translated  
18 by team members, did not meet full inclusion criteria.

19

#### 20 *Screening and Data Extraction*

21 Database search results were first imported into Endnote for initial deduplication. The  
22 remaining records were uploaded into Covidence, an online subscription-based systematic  
23 review tool, where a second deduplication procedure was completed. All abstracts were screened  
24 by two independent reviewers from the study team with full blinding for initial eligibility.  
25 Disagreements were resolved through team discussions. Articles meeting initial eligibility were  
26 reviewed in full by four members of the team (BDR, MG, Y-HC, SN). Regular team discussions  
27 with the lead author (NK) facilitated final decisions on the inclusion of articles and their  
28 relevance to study aims.

29 A data extraction form was created and implemented through Covidence to  
30 systematically collect relevant information from included studies. The data extraction form was  
31 iteratively developed such that an initial form, based on study goals, was refined through

1 multiple pilot rounds to extract relevant data from articles on transition strategies described  
2 across interventions until consensus was reached. Study information extracted from each article  
3 included author and month of publication; intervention setting (i.e., ED or inpatient); country;  
4 program/intervention name; target SUD population (e.g., OUD, AUD, etc.); study design and  
5 sample size; and evaluated post-discharge SUD treatment outcomes. For each article, detailed  
6 information was extracted on any described “transition strategies,” which we defined as practices  
7 (i.e. procedures or activities) undertaken to help link patients from the acute-care setting to  
8 community-based treatment at discharge. We also extracted information on other relevant  
9 intervention components described at the acute-care phase (location and types of staff delivering  
10 care in the acute-care setting, use of medications or brief interventions), the transition phase  
11 (location and types of staff involved in facilitating transition) and community treatment phase –  
12 including the SUD services or settings patients were being transitioned to (e.g. specialty SUD  
13 treatment programs, bridge clinics (generally low-barrier short-term programs to treat OUD  
14 while connecting patients to community resources[17])). Finally, we extracted information on  
15 any reported barriers or facilitators to support the transition of patients from acute-care to  
16 ongoing treatment in community-based settings.

17

### 18 *Synthesis of Intervention Components and Transition Strategies*

19 We applied a narrative synthesis approach[18] to review the studies of acute-care  
20 interventions and the range of practices they employ to support the transition of patients to  
21 community-based SUD care. To do this, the lead author (NK) conducted an initial content  
22 analysis of each article focusing specifically on language related to transitioning patients from  
23 the acute-care to the community setting. The content was coded inductively and categorized into  
24 a typology of common “transition strategy” categories based on similar practices that emerged  
25 across the individual programs and interventions (e.g. scheduling appointment with a particular  
26 provider, providing transportation assistance to treatment appointment). Typology  
27 categorizations were discussed with the full team and iteratively modified based on team  
28 members’ expertise, until consensus was reached. To ensure consistency, a second member of  
29 the team (BR) double coded all transition strategies based on the final typology categories. The  
30 frequency of each transition strategy was then tallied across studies to characterize their  
31 distribution across the explored interventions in the ED and inpatient hospital settings.

1  
2  
3  
4  
5  
6  
7  
8  
9  
10  
11  
12  
13  
14  
15  
16  
17  
18  
19  
20  
21  
22  
23  
24  
25  
26  
27  
28  
29  
30  
31

## *Synthesis of Primary Barriers and Facilitators across Transitions*

Finally, to gain a better understanding of the implementation challenges involved in the transition of patients from acute- to community-based care, we conducted an analysis of the barriers and facilitators reported in the included articles pertaining specifically to the transition of patients across settings. Barriers and facilitators were organized based on five domains described in the Consolidated Framework for Implementation Research (CFIR)[19], including “intervention characteristics” (e.g. care coordination procedures, hospital-community provider partnerships), “inner setting” (resources for addiction care; provider time constraints), “outer setting” (regulation of MOUD; availability of MOUD providers), “individual characteristics” (provider attitudes; training in addiction care) and “implementation process” (leadership engagement; outcome evaluation).

## **Results**

A total of 3,738 unique records were identified across databases based on title and abstract screening. Of these, 206 were selected for full-text review, and 45 met full inclusion criteria. The PRISMA diagram outlining the study inclusion process is presented in Figure 2.

### **Characteristics of Included Studies**

An overview of characteristics of included studies is presented in Table 1, with details of each study available in Supplemental Table 3. Due to the distinct nature of ED and inpatient hospital interventions and settings, we present findings overall and by setting type. Of the 45 studies identified, 56% (n=25) described interventions taking place in the ED, 38% (n=17) in inpatient hospital settings, and 7% (n=3) interventions taking place in both ED and inpatient hospital settings. A large majority (n=38, 84%) of studies were U.S.-based. Study design varied, with the majority being observational studies (n=19, 42%) followed by pilot/feasibility studies (n=16, 36%) and randomized control trials (n=10, 22%). Interventions commonly targeted patients with OUD (n=32, 71%), followed by patients with AUD (n=15, 33%), and patients with SUD generally (n=14, 31%). Studies reported on multiple outcome measures related to linkage to community-based SUD treatment: The most common measures were whether there was any



1 visit following discharge (n=28, 62%) and length of time retained in treatment post discharge  
2 (n=30, 67%) with some reporting time to first visit post-discharge (n=3, 7%). The exact  
3 definitions and metrics used to quantify the treatment engagement measures varied widely across  
4 articles, making intervention effects incomparable across studies. There was also great variability  
5 in the methods used to ascertain data on treatment engagement and in the reporting quality of  
6 these methods, which ranged from active data collection through contact with SUD providers  
7 (n=9, 20%), patients (n=6, 13%), or unspecified sources (n=14, 31%), to relying on existing data  
8 available through EHR (n=23, 51%) or other sources (n=6, 13%).

9

## 10 **Typology of Transition Strategies**

11 The content analysis and inductive coding process resulted in a typology of 10 transition  
12 strategies that encompass practices to facilitate patients' transition between acute-care and  
13 community-based SUD treatment settings. These were further divided into five "pre-discharge  
14 transition strategies"- which occur prior to patients leaving the acute-care setting - and five  
15 "post-discharge transition strategies" - which occur after the patient has already left the acute-  
16 care setting. Table 2 presents the typology of transition strategies, a description of each, and an  
17 example from the reviewed literature. Identified pre-discharge transition strategies included:  
18 Discuss Treatment Options; Schedule Appointment; Provider List; Electronic Referral; and  
19 General Linkage to Treatment. Identified post-discharge transition strategies included: Bridge  
20 Prescription; Transportation Assistance; Follow up Calls/Texts; Care Navigation; and Peer  
21 Support. Transition strategies described in each study were not mutually exclusive: In many  
22 cases, an intervention may have combined 2-3 of these strategies within the same intervention or  
23 tested multiple different strategies across intervention and control groups (see Supplemental  
24 Table 3 for the transition strategies identified in each study). For example, an interprofessional  
25 addiction consult service might discuss treatment options and schedule post-hospital  
26 appointments before discharge, and offer bridging medication prescription or peer support after  
27 discharge [12]. In addition, while categorized based on similarity of approach, the settings, staff  
28 involved, intensity of each transition strategy often varied substantially across studies, which  
29 could influence transition outcomes. For example, in some interventions, staff that supported  
30 care transitions such as peer navigators met patients in the hospital and continued working with  
31 them post-discharge [20], while in others, care navigators supporting transitions only contacted

1 patients following discharge via phone calls[21]. In many cases, the level of detail on the actual  
2 transition practices involved were rather vague or unspecified and therefore difficult to extract  
3 and compare across interventions.

4 Figure 3 presents the frequency of pre-discharge and post-discharge strategies described  
5 across included interventions taking place in ED and inpatient hospital settings. For both ED and  
6 inpatient hospital settings, the most common pre-discharge transition strategy was scheduling an  
7 appointment, which was mentioned in 57% (n=16) of ED interventions and 50% (n=10) of  
8 inpatient interventions. In as many as 36% (n=10) of ED interventions and 30% (n=6) of  
9 inpatient interventions, there was a general mention of pre-discharge linkage of patients to SUD  
10 treatment programs or providers in the community, but there was no specific information on how  
11 this linkage was made or supported. While providing a bridge medication prescription was the  
12 most common post-discharge strategy mentioned in the ED setting (36%, n=10), it was much  
13 less commonly noted in the inpatient setting (20%, n=4. Care navigation and transportation  
14 assistance were more common in inpatient interventions (30%, n=6, for both) than ED settings  
15 (25%, n=7 and 18%, n=5, respectively). These differences may reflect the different  
16 circumstances and resources available across ED and inpatient settings, including the longer  
17 discharge planning period that is often available in inpatient settings and not ED settings.

18

### 19 **Additional Intervention Components across Care Continuum**

20 For each study, we identified and organized additional relevant components of the  
21 described interventions across the care continuum from the acute-care phase in the ED/hospital,  
22 to the transition phase supporting acute-care to community treatment, and the community  
23 treatment phase where patients are linked (Table 3).

24 The most common staff types involved at the acute-care phase were medical doctors  
25 (n=22, 49%) and multidisciplinary addiction care teams (n=11, 24%), which were much more  
26 common in inpatient hospital settings (n=9, 45%) than ED settings (n=4, 14%). Many studies  
27 (n=11, 24%), particularly in the ED setting (n=9, 32%), did not specify what staff types were  
28 involved in delivering acute-care. In the majority of studies, described staff worked directly  
29 within the hospital unit (n=34, 76%), while in some they were called upon as part of an in-  
30 hospital consult service (n=5, 11%). When we assessed whether medications or behavioral brief  
31 interventions were delivered in the acute-care setting, the majority of studies involved

1 buprenorphine initiation (n=26, 58%) with some mentioning methadone (n=10, 22%) or  
2 naltrexone (n=6, 13%) initiation. Nearly a third (n=14, 31%) of interventions did not mention  
3 any medications for SUD. Using an SBIRT model was reported in 16% (n=7) of studies and 9%  
4 (n=4) noted other brief interventions - these were primarily implemented in the ED (n=9, 32%)  
5 rather than inpatient hospital settings (10%).

6 For the transition phase, we found that for some interventions, transitions were facilitated  
7 by the same staff that delivered the acute-care portion of the intervention, while others had  
8 additional or unique staff delivering these practices. The most common staff types mentioned in  
9 this phase were medical doctors (n=25, 56%), especially in ED settings (n=18, 64%), followed  
10 by social workers or case managers (n=15, 33%), which were more common in inpatient hospital  
11 setting (n=10, 50%). In a few cases (n=3, 7%), staff facilitating the transition were noted to be  
12 part of a study research team rather than an acute-care clinical team. The location of transition  
13 staff varied across ED and inpatient interventions, with ED interventions more commonly  
14 relying on staff within the ED to facilitate the transition (n=23, 82%) while inpatient  
15 interventions often relied on staff called upon as part of a consult team (n=3, 15%) or employed  
16 by an external organization (n=7, 35%). Examples of consult or externally-employed staff  
17 facilitating transitions included medical toxicologists [22], resource specialists[23], patient  
18 engagement specialists [24] and peer specialists [21,25,26].

19 Finally, we assessed the nature of community treatment settings to which the studied  
20 interventions linked SUD patients following discharge. Studies most commonly described their  
21 intervention as generally linking patients to SUD treatment providers, but the exact nature or  
22 setting was unspecified (n=26, 58%). Many mentioned linking patients to treatment with MOUD  
23 specifically (n=26, 58%), especially in ED interventions (n=17, 61%). Other treatment settings  
24 included detoxification programs (n=4, 9%), residential treatment programs, (n=8, 18%), bridge  
25 clinics (n=7, 16%), and primary care providers (n=5, 11%). In addition to SUD treatment  
26 services, 7% (n=3) linked to peer support or self-help groups, 13% (n=6) to other medical or  
27 mental health services, 7% 24% (n=11) linked patients to other community or social services,  
28 which was more common amongst inpatient interventions (n=7, 35%). Only 4% (n=2) of  
29 interventions (all in the inpatient setting) mentioned linking patients to harm reduction services.

30

### 31 **Barriers and Facilitators to Transitions of Care**

1 Authors of included studies discussed a range of barriers and facilitators that they found  
2 to be influential to the success of supporting the transition of patients from acute-care to ongoing  
3 SUD care in the community. Findings are organized based on CFIR domains as follows:

4 Intervention characteristics. Multiple studies noted barriers related to planning and  
5 executing the transition intervention itself, such as limited financial resources for program  
6 operations [27], difficulty of building partnerships between hospital and community-based SUD  
7 programs [22] and managing logistics and communication between hospital and community  
8 treatment teams to coordinate follow-up care for patients discharged from acute-care settings  
9 [28,29]. Facilitators discussed to alleviate some of these barriers included leveraging existing  
10 resources of community-based providers [27], having the same community-based providers also  
11 work in the acute-care setting to build trust and continuity across settings [27,30,31], and  
12 maintaining a close working relationship and open lines of communication between acute-care  
13 staff and community providers [32].

14 Inner Setting and Individual Characteristics. Many also discussed barriers and facilitators  
15 related to the acute-care setting of where the interventions took place and the individuals that  
16 delivered these interventions. Barriers described included limited staff capacity and slow uptake  
17 of novel protocols in the landscape of busy hospital units [33,34], implicit bias against the SUD  
18 population among acute-care providers [35], and frequent undertreatment of withdrawal in these  
19 settings [36]. Some facilitators for delivering care in these settings included conducting  
20 educational sessions for hospital staff to improve awareness of interventions and introduce  
21 concepts of harm reduction and trauma-informed care [27], and having the intervention delivered  
22 by non-medical staff such as social workers [28], patient navigators [20], individuals in recovery  
23 or peer recovery coaches [26,32] or external staff from community based programs who could  
24 dedicate more time to patients [31]. Studies also mentioned the importance of coordinating  
25 services across hospital care teams to improve efficiency [37] and the value of having supervisors  
26 who could help support intervention staff in coordinating patient care [20,32].

27 Outer Setting. Studies described multiple factors influencing the success of the transition  
28 that related to the outer setting of community services and resources. Barriers included limited  
29 availability and capacity of community SUD treatment providers such as limited hours of  
30 operation [38,39], frequent staff turnover [29], and limited availability in rural settings [40].  
31 Many also mentioned the multiple vulnerabilities and social risk factors that SUD patients face,

1 including employment instability, lack of housing, limited transportation, criminal justice  
2 involvement and other medical needs[23,30,40–43]. For digital interventions, barriers were  
3 mentioned around use of technology or distrust of sharing sensitive information [44]. Multiple  
4 studies also mentioned challenges around patient disinterest or motivation to continue treatment  
5 [26,33,43,44]. Finally, many discussed structural barriers such as federal regulations that limit  
6 availability of MOUD [38,40], the segregation of SUD treatment services from other medical  
7 and healthcare services[23] and limited financial coverage for SUD services among some  
8 populations [45]. Some examples of facilitators to address some of these barriers included  
9 providing bridge medications and services on days where community clinics are closed [46]and  
10 co-locating or working with community-based services near the acute-care setting to facilitate  
11 access [47,48]. To address patient barriers, some discussed the importance of allowing for patient  
12 preference in choosing care options [35], creating service models that integrate SUD care with  
13 other medical, mental health and social supports [23] and dedicating monetary funds as part of  
14 care navigation support to address social challenges faced by patients leaving the hospital [20].  
15 To address financial and structural barriers, some mentioned working with services where  
16 patients' ability to pay did not influence service access [29]and pointed to the more flexible  
17 treatment policies and universal healthcare system in Canada that alleviated access and financial  
18 barriers relative to the US [49].

19 Implementation Process. While few explicitly discussed barriers and facilitators related to  
20 the process of implementation, one study did note that leadership involvement and early buy-in  
21 was a critical success factor during the implementation and post-implementation processes of  
22 their transition intervention [32].

23

## 24 **Discussion**

25 The field of addiction medicine is at a critical time in which hospitals and health systems  
26 are paying greater attention to the care of patients with SUD. Growing research about the  
27 efficacy of acute-care interventions[6,7,50,51] along with advocacy on behalf of medical  
28 societies and other groups for health systems to improve care for SUD [8,52,53]have instigated a  
29 rapid expansion of these programs. Indeed, implementing acute-care interventions for overdose  
30 and SUD is noted in national recommendations to address the overdose crisis[54,55] and often a  
31 priority for resource allocation in the wake of the opioid lawsuit settlement funds[56,57]. Despite

1 these advances, there is still much that remains unknown about what makes these hospital  
2 interventions and their implementation most effective. Specifically, while linkage to ongoing  
3 community treatment for SUD after hospitalization is almost always highlighted as a desired  
4 outcome, how this transition is best supported by these interventions is much less clear. As such,  
5 our paper aimed to begin addressing this gap by establishing a typology of existing strategies for  
6 linking SUD patients from acute-care settings to community-based treatment.

7 As expected, our study identified significant heterogeneity in practices for transitioning  
8 patients from the acute-care setting to community treatment, in both the procedures and activities  
9 (“transition strategies”) employed, as well as other components of interventions used to support  
10 these strategies, such as the staff types involved or setting to which patients were being  
11 transitioned. Moreover, across interventions, even similar practices were often delivered by staff  
12 with very different roles (e.g. medical doctor vs. social worker) or via different staffing models  
13 (e.g. consult service vs. in-unit staff). In some cases, interventions were delivered by external  
14 research staff, which raises questions about sustainability of these practices. There was also  
15 significant variability in the dose, intensity, and resources available for the transition strategies  
16 employed. Still, we were able to organize strategies into an initial typology based on recurrent  
17 approaches amongst the described interventions, which can serve as a basis for future work on  
18 the relative effectiveness of these strategies and how they might interact with other intervention  
19 components. Importantly, our study identified a distinction between transition strategies that  
20 occur prior vs. following patient discharge from the acute-care setting, which may have different  
21 implications for implementation and resource allocation.

22 An important finding of this scoping review is that it highlights the rather scarce  
23 information available in the scientific literature about the nature of transition strategies that occur  
24 as part of acute-care interventions for SUD. As many as one third of studies reviewed at the full-  
25 text phase (n=51) were excluded for not having a description of practices involved in  
26 transitioning patients from the hospital to community treatment. This is despite many still having  
27 community SUD treatment linkage as a primary outcome of their studied intervention. Even  
28 among studies that did include a description of the transition strategies, details of the specific  
29 activities or procedures, duration, or individuals involved in executing the transition strategy  
30 were often left out. One of the most common pre-discharge transition strategies identified in our  
31 typology in both ED and inpatient hospital interventions was “General Linkage to Treatment,” in

1 which there was some type of linkage or referral involved, but there were no further details  
2 provided around how such linkage was facilitated. Even studies describing conducting a “warm-  
3 handoff”, often did not explain what this entailed. It is possible some of these details may have  
4 been previously published in program descriptions excluded from our review[12,58]. Still, this  
5 lack of detail reveals that the transition to community treatment itself has been underestimated in  
6 importance in research and potentially in intervention planning itself. This has been recognized  
7 in the past with SBIRT studies where the “RT- referral to treatment” portion of the intervention  
8 is rarely included or described[11]. And while much of the care coordination and care transitions  
9 literature even outside of SUD care is complex and somewhat opaque [59], the SUD transitions  
10 literature seems to be particularly obscure. These findings emphasize the need for the addiction  
11 medicine field to place greater emphasis on the transition portion of these interventions, a feat  
12 that likely requires greater collaboration across inpatient and outpatient care services.

13         Across reviewed studies, many implementation barriers and facilitators to supporting  
14 patient transitions were discussed, ranging from organizational characteristics specific to acute-  
15 care settings, to wider issues around provider availability and treatment policies that influence  
16 care options in the community. While hospital intervention teams did not always have power to  
17 eliminate these barriers, many described creative solutions, such as forming partnerships and  
18 workflows with community programs and trying to match needs and preferences of patients with  
19 services offered. Multiple prior studies have assessed barriers and facilitators to the  
20 implementation of ED and inpatient hospital-based interventions for SUD[60], but less attention  
21 has focused explicitly on the process of transition to ongoing community treatment[61,62]. Thus,  
22 more work is needed to understand and address barriers as they relate to the range of transition  
23 strategies identified in this review, how they are supported and reimbursed, and how they play  
24 out differently in ED vs. inpatient hospital settings. This understanding can help better guide  
25 resource allocation towards closing gaps in continuity of care, especially as hospital systems  
26 begin to integrate OUD Cascade of Care models and other mechanisms to track patient  
27 continuity across care settings[63,64] Critical to these efforts will be continuing to address  
28 existing barriers to retention in treatment once patients are linked with community-based care,  
29 which are frequently experienced among patients referred to treatment from ED or inpatient  
30 hospital settings [65–67].

31         It is important to place this study in the context of recent efforts to better streamline and

1 characterize acute-care interventions for SUD, whose wide range of outcomes have been recently  
2 synthesized in a systematic review by James et al. (2023)[10]. In the inpatient setting, this has  
3 included efforts to compare and contrast different models of hospital-based care for SUD  
4 patients that range from interprofessional addiction consult models to community in-reach  
5 models, and vary based on target population, staff roles, clinical activities (including discharge  
6 planning), and larger systems change activities[7]. In the ED setting, multiple models of care  
7 have been described and compared, and often involve various combinations of MOUD  
8 prescribing, peer support or brief interventions, and referrals and bridge clinics to support  
9 patients' continuity of care [68,69]. Further work is needed to characterize how these different  
10 models of care make use of particular transition strategies identified in this review, and how  
11 these strategies interact with other characteristics of acute-care interventions to successfully  
12 engage patients in ongoing care. While it may not be possible to disentangle all the individual  
13 components of these complex interventions to study their independent effects, thoughtfully  
14 characterizing these elements when designing and comparing interventions or models of care is  
15 critical for informing their effective implementation and sustainability. As such, the current  
16 review can set the stage for studying how certain transition strategies interact with other  
17 components of interventions and service models to support the transition of patients to  
18 community treatment. Finally, it is important to note that few interventions noted referring  
19 patients to harm reduction or other medical or mental health services. While this may have not  
20 been the primary goals of the included interventions, it is crucial that acute-care interventions for  
21 SUD patients, many whom may not be interested in treatment, better integrate harm reduction  
22 and other services to address risks and complex health needs of SUD patients[70].

23 Our study is subject to multiple limitations. First, our typology represents an attempt to  
24 classify SUD transition strategies based on peer-reviewed articles that typically describe only  
25 limited components of complex and heterogeneous interventions. The typology is therefore by  
26 nature reductive and only based on practices reported in the peer-reviewed literature, with the  
27 goal of forming an initial categorization scheme that would be more suitable for comparison and  
28 evaluation across multiple settings and programs. Our typology also does not take into account  
29 variation in dose, intensity, or resources allocated for the strategies described, which should be  
30 an important focus of future research. Second, as we limited our inclusion to studies that reported  
31 linkage outcomes, we may have missed articles that describe the intervention and the transition



1 strategies in more detail, but were not captured in included articles. Thus, the transition strategies  
2 described here should be used to exemplify the breadth and types of strategies described in the  
3 literature, not provide a comprehensive list of possible transition strategies. Third, our study  
4 inclusion period covered a time period of over 20 years, during which there were many changes  
5 in the burden and need for SUD interventions, and in the clinical approaches to addressing SUDs  
6 during this time. This is especially notable in the rapid proliferation of overdose and OUD  
7 interventions involving MOUD over the last five years. Thus, while some of the older studies  
8 can still provide relevant insight into transition strategies that have been implemented in the past,  
9 some may not be as relevant to the most up-to-date clinical practice today. Finally, as our review  
10 was limited to peer-reviewed studies published before October of 2022, and as this is a rapidly  
11 evolving field, it is possible we may have missed other studies that were published more recently  
12 or that are available in the gray literature.

13 In sum, this scoping review aimed to review the literature and draw attention to SUD care  
14 transition strategies as a critical element of effective acute-care interventions. It is the hope that  
15 this initial typology and framework can help us begin to better describe and compare strategies  
16 implemented, toward more robust evaluations of programs and translation of effective  
17 interventions across care settings. Finally, improving our knowledge of care transition strategies  
18 is not only important in the context of acute-care interventions, but can serve to improve  
19 transitions of care among SUD patients across multiple touchpoints. Thus, future work should  
20 focus on how transition strategies may best support care continuity in SUD service utilization at  
21 other high-risk moments, such as at discharge from criminal legal settings or when transitioning  
22 from bridge clinics to long term primary care or other community-based care settings.

23  
24  
25

## 1 Bibliography

- 2
- 3 1. Goedel WC, Shapiro A, Cerdá M, Tsai JW, Hadland SE, Marshall BDL. Association of Racial/Ethnic  
4 Segregation With Treatment Capacity for Opioid Use Disorder in Counties in the United States. *JAMA*  
5 *Netw Open* [Internet]. American Medical Association; 2020 [cited 2020 Apr 24];3:e203711. Available  
6 from: <https://jamanetwork.com/journals/jamanetworkopen/fullarticle/2764663>
- 7 2. Binswanger IA, Carroll NM, Ahmedani BK, Campbell CI, Haller I V., Hechter RC, et al. The  
8 association between medical comorbidity and Healthcare Effectiveness Data and Information Set  
9 (HEDIS) measures of treatment initiation and engagement for alcohol and other drug use disorders. *Subst*  
10 *Abus*. Routledge; 2019;40:292–301.
- 11 3. Abraham AJ, Andrews CM, Harris SJ, Friedmann PD. Availability of Medications for the Treatment of  
12 Alcohol and Opioid Use Disorder in the USA. *Neurotherapeutics*. Springer; 2020. p. 55–69.
- 13 4. Krawczyk N, Rivera BD, Jent V, Keyes KM, Jones CM, Cerdá M. Has the treatment gap for opioid use  
14 disorder narrowed in the U.S.?: A yearly assessment from 2010 to 2019". *Int J Drug Policy* [Internet]. *Int*  
15 *J Drug Policy*; 2022 [cited 2022 Aug 7];103786. Available from:  
16 <https://pubmed.ncbi.nlm.nih.gov/35934583/>
- 17 5. Larochelle MR, Bernstein R, Bernson D, Land T, Stopka TJ, Rose AJ, et al. Touchpoints –  
18 Opportunities to predict and prevent opioid overdose: A cohort study. *Drug Alcohol Depend*. Elsevier  
19 Ireland Ltd; 2019;204:107537.
- 20 6. Hawk K, D’Onofrio G. Emergency department screening and interventions for substance use disorders.  
21 *Addiction Science and Clinical Practice* [Internet]. BioMed Central Ltd.; 2018 [cited 2023 Mar 13];13:1–  
22 6. Available from: <https://ascpjournals.biomedcentral.com/articles/10.1186/s13722-018-0117-1>
- 23 7. Englander H, Jones A, Krawczyk N, Patten A, Roberts T, Korthuis PT, et al. A Taxonomy of Hospital-  
24 Based Addiction Care Models: a Scoping Review and Key Informant Interviews. *J Gen Intern Med*  
25 [Internet]. *J Gen Intern Med*; 2022 [cited 2023 Mar 13];37:2821–33. Available from:  
26 <https://pubmed.ncbi.nlm.nih.gov/35534663/>
- 27 8. Hawk K, Hoppe J, Ketcham E, LaPietra A, Moulin A, Nelson L, et al. Consensus Recommendations on  
28 the Treatment of Opioid Use Disorder in the Emergency Department. *Ann Emerg Med*. Mosby;  
29 2021;78:434–42.
- 30 9. Shmuts R, Kay A, Beck M. Guidelines for the assessment and management of addiction in the  
31 hospitalized patient with opioid use disorder: a twenty-first century update. *Intern Emerg Med*. Springer  
32 Science and Business Media Deutschland GmbH; 2021;

- 1 10. James H, Morgan J, Ti L, Nolan S. Transitions in care between hospital and community settings for  
2 individuals with a substance use disorder: A systematic review. *Drug Alcohol Depend.* Elsevier;  
3 2023;243:109763.
- 4 11. Glass JE, Hamilton AM, Powell BJ, Perron BE, Brown RT, Ilgen MA. Specialty substance use  
5 disorder services following brief alcohol intervention: a meta-analysis of randomized controlled trials.  
6 *Addiction* [Internet]. John Wiley & Sons, Ltd; 2015 [cited 2023 Mar 12];110:1404–15. Available from:  
7 <https://onlinelibrary.wiley.com/doi/full/10.1111/add.12950>
- 8 12. Englander H, Dobbertin K, Lind BK, Nicolaidis C, Graven P, Dorfman C, et al. Inpatient Addiction  
9 Medicine Consultation and Post-Hospital Substance Use Disorder Treatment Engagement: a Propensity-  
10 Matched Analysis. *J Gen Intern Med.* Springer New York LLC; 2019;34:2796–803.
- 11 13. Cao SS, Dunham SI, Simpson SA. Prescribing Buprenorphine for Opioid Use Disorders in the ED: A  
12 Review of Best Practices, Barriers, and Future Directions. *Open Access Emerg Med* [Internet]. Open  
13 Access Emerg Med; 2020 [cited 2023 Mar 13];12:261–74. Available from:  
14 <https://pubmed.ncbi.nlm.nih.gov/33116962/>
- 15 14. Williams AR, Nunes E V., Bisaga A, Levin FR, Olfson M. Development of a Cascade of Care for  
16 responding to the opioid epidemic. *American Journal of Drug and Alcohol Abuse* [Internet]. 2019 [cited  
17 2019 Apr 16];45:1–10. Available from:  
18 <https://www.tandfonline.com/doi/full/10.1080/00952990.2018.1546862>
- 19 15. Williams AR, Johnson KA, Thomas CP, Reif S, Socías EM, Henry BF, et al. Opioid use disorder  
20 Cascade of care framework design: A roadmap. <https://doi.org/10.1080/0889707720222074604> [Internet].  
21 Taylor & Francis; 2022 [cited 2022 Jun 4];43:1207–14. Available from:  
22 <https://www.tandfonline.com/doi/abs/10.1080/08897077.2022.2074604>
- 23 16. Tricco AC, Lillie E, Zarin W, O’Brien KK, Colquhoun H, Levac D, et al. PRISMA Extension for  
24 Scoping Reviews (PRISMA-ScR): Checklist and Explanation. *Ann Intern Med* [Internet]. American  
25 College of Physicians; 2018 [cited 2021 Feb 3];169:467. Available from:  
26 <http://annals.org/article.aspx?doi=10.7326/M18-0850>
- 27 17. Sullivan RW, Szczesniak LM, Wojcik SM. Bridge clinic buprenorphine program decreases  
28 emergency department visits. *J Subst Abuse Treat.* Pergamon; 2021;130:108410.
- 29 18. Popay J, Arai L, Rodgers M, Britten N. Guidance on the conduct of narrative synthesis in systematic  
30 reviews: A product from the ESRC Methods Programme Communities in Control-Big Local Evaluation  
31 View project VOICES (ViOlence: Impact on Children Evidence Synthesis) View project. 2006 [cited  
32 2021 Apr 8]; Available from: <https://www.researchgate.net/publication/233866356>
- 33 19. The Consolidated Framework for Implementation Research – Technical Assistance for users of the  
34 CFIR framework [Internet]. [cited 2021 Apr 13]. Available from: <https://cfirguide.org/>

- 1 20. Gryczynski J, Nordeck CD, Welsh C, Mitchell SG, O’Grady KE, Schwartz RP. Preventing Hospital  
2 Readmission for Patients With Comorbid Substance Use Disorder. *Ann Intern Med* [Internet]. American  
3 College of Physicians; 2021;174:899–909. Available from: <https://doi.org/10.7326/M20-5475>
- 4 21. Wakeman SE, Rigotti NA, Herman GE, Regan S, Chang Y, Snow R, et al. The effectiveness of post-  
5 discharge navigation added to an inpatient addiction consultation for patients with substance use disorder;  
6 a randomized controlled trial. *Subst Abus* [Internet]. Taylor & Francis; 2021;42:646–53. Available from:  
7 <https://doi.org/10.1080/08897077.2020.1809608>
- 8 22. Beauchamp GA, Laubach LT, Esposito SB, Yazdanyar A, Roth P, Lauber P, et al. Implementation of  
9 a Medication for Addiction Treatment (MAT) and Linkage Program by Leveraging Community  
10 Partnerships and Medical Toxicology Expertise. *Journal of Medical Toxicology* [Internet]. 2021;17:176–  
11 84. Available from: <https://doi.org/10.1007/s13181-020-00813-4>
- 12 23. Wakeman SE, Kane M, Powell E, Howard S, Shaw C, Kehoe L, et al. A hospital-wide initiative to  
13 redesign substance use disorder care: Impact on pharmacotherapy initiation. *Subst Abus* [Internet]. Taylor  
14 & Francis; 2021;42:767–74. Available from: <https://doi.org/10.1080/08897077.2020.1846664>
- 15 24. Pecoraro A, Horton T, Ewen E, Becher J, Wright PA, Silverman B, et al. Early data from project  
16 engage: a program to identify and transition medically hospitalized patients into addictions treatment.  
17 *Addiction Science & Clinical Practice* [Internet]. 2012;7:20. Available from:  
18 <https://doi.org/10.1186/1940-0640-7-20>
- 19 25. Byrne KA, Roth PJ, Merchant K, Baginski B, Robinson K, Dumas K, et al. Inpatient link to peer  
20 recovery coaching: Results from a pilot randomized control trial. *Drug Alcohol Depend* [Internet].  
21 2020;215:108234. Available from:  
22 <https://www.sciencedirect.com/science/article/pii/S0376871620303999>
- 23 26. Dahlem CH (Gina), Scalera M, Anderson G, Tasker M, Ploutz-Snyder R, McCabe SE, et al. Recovery  
24 opioid overdose team (ROOT) pilot program evaluation: A community-wide post-overdose response  
25 strategy. *Subst Abus* [Internet]. Taylor & Francis; 2021;42:423–7. Available from:  
26 <https://doi.org/10.1080/08897077.2020.1847239>
- 27 27. Brothers TD, Fraser J, MacAdam E, Morgan B, Francheville J, Nidumolu A, et al. Implementation  
28 and evaluation of a novel, unofficial, trainee-organized hospital addiction medicine consultation service.  
29 *Subst Abus* [Internet]. Taylor & Francis; 2021;42:433–7. Available from:  
30 <https://doi.org/10.1080/08897077.2020.1856291>
- 31 28. Kelly T, Hoppe JA, Zuckerman M, Khoshnoud A, Sholl B, Heard K. A novel social work approach to  
32 emergency department buprenorphine induction and warm hand-off to community providers. *Am J*  
33 *Emerg Med* [Internet]. 2020;38:1286–90. Available from:  
34 <https://www.sciencedirect.com/science/article/pii/S0735675719308459>

- 1 29. Edwards FJ, Wicelinski R, Gallagher N, McKinzie A, White R, Domingos A. Treating Opioid  
2 Withdrawal With Buprenorphine in a Community Hospital Emergency Department: An Outreach  
3 Program. *Ann Emerg Med* [Internet]. Elsevier; 2020;75:49–56. Available from:  
4 <https://doi.org/10.1016/j.annemergmed.2019.08.420>
- 5 30. Dunkley CA, Carpenter JE, Murray BP, Sizemore E, Wheatley M, Morgan BW, et al. Retrospective  
6 Review of a Novel Approach to Buprenorphine Induction in the Emergency Department. *Journal of*  
7 *Emergency Medicine* [Internet]. Elsevier; 2019;57:181–6. Available from:  
8 <https://doi.org/10.1016/j.jemermed.2019.03.029>
- 9 31. Schwarz A-S, Nielsen B, Sjøgaard J, Sjøgaard Nielsen A. Making a bridge between general hospital  
10 and specialised community-based treatment for alcohol use disorder—A pragmatic randomised controlled  
11 trial. *Drug Alcohol Depend* [Internet]. 2019;196:51–6. Available from:  
12 <https://www.sciencedirect.com/science/article/pii/S0376871619300237>
- 13 32. Bogan C, Jennings L, Haynes L, Barth K, Moreland A, Oros M, et al. Implementation of emergency  
14 department-initiated buprenorphine for opioid use disorder in a rural southern state. *J Subst*  
15 *Abuse Treat* [Internet]. Elsevier; 2020;112:73–8. Available from:  
16 <https://doi.org/10.1016/j.jsat.2020.02.007>
- 17 33. Monico LB, Oros M, Smith S, Mitchell SG, Gryczynski J, Schwartz R. One million screened: Scaling  
18 up SBIRT and buprenorphine treatment in hospital emergency departments across Maryland. *Am J Emerg*  
19 *Med* [Internet]. 2020;38:1466–9. Available from:  
20 <https://www.sciencedirect.com/science/article/pii/S0735675720301479>
- 21 34. LeSaint KT, Klapthor B, Wang RC, Geier C. Buprenorphine for Opioid Use Disorder in the  
22 Emergency Department: A Retrospective Chart Review. *Western Journal of Emergency Medicine:*  
23 *Integrating Emergency Care with Population Health*. 2020;21.
- 24 35. Regan S, Howard S, Powell E, Martin A, Dutta S, Hayes BD, et al. Emergency Department-initiated  
25 Buprenorphine and Referral to Follow-up Addiction Care: A Program Description. *J Addict Med*  
26 [Internet]. 2022;16. Available from:  
27 [https://journals.lww.com/journaladdictionmedicine/Fulltext/2022/04000/Emergency\\_Department\\_initiate](https://journals.lww.com/journaladdictionmedicine/Fulltext/2022/04000/Emergency_Department_initiate_d_Buprenorphine_and.18.aspx)  
28 [d\\_Buprenorphine\\_and.18.aspx](https://journals.lww.com/journaladdictionmedicine/Fulltext/2022/04000/Emergency_Department_initiate_d_Buprenorphine_and.18.aspx)
- 29 36. Kaucher KA, Caruso EH, Sungar G, Gawenus L, Hurlbut K, Sanchez DC, et al. Evaluation of an  
30 emergency department buprenorphine induction and medication-assisted treatment referral program. *Am*  
31 *J Emerg Med* [Internet]. 2020;38:300–4. Available from:  
32 <https://www.sciencedirect.com/science/article/pii/S0735675719305030>

- 1 37. Berger L, Hernandez-Meier J, Hyatt J, Brondino M. Referral to treatment for hospitalized medical  
2 patients with an alcohol use disorder: A proof-of-concept brief intervention study. *Soc Work Health Care*  
3 [Internet]. Routledge; 2017;56:321–34. Available from: <https://doi.org/10.1080/00981389.2017.1299073>
- 4 38. Jennings LK, Lane S, McCauley J, Moreland A, Hartwell K, Haynes L, et al. Retention in Treatment  
5 after Emergency Department-Initiated Buprenorphine. *Journal of Emergency Medicine* [Internet].  
6 Elsevier; 2021;61:211–21. Available from: <https://doi.org/10.1016/j.jemermed.2021.04.007>
- 7 39. D’Onofrio G, Degutis LC. Integrating Project ASSERT: A Screening, Intervention, and Referral to  
8 Treatment Program for Unhealthy Alcohol and Drug Use Into an Urban Emergency Department.  
9 *Academic Emergency Medicine* [Internet]. John Wiley & Sons, Ltd; 2010;17:903–11. Available from:  
10 <https://doi.org/10.1111/j.1553-2712.2010.00824.x>
- 11 40. Englander H, Dobbertin K, Lind BK, Nicolaidis C, Graven P, Dorfman C, et al. Inpatient Addiction  
12 Medicine Consultation and Post-Hospital Substance Use Disorder Treatment Engagement: a Propensity-  
13 Matched Analysis. *J Gen Intern Med* [Internet]. 2019;34:2796–803. Available from:  
14 <https://doi.org/10.1007/s11606-019-05251-9>
- 15 41. Beielser AM, Klein JW, Bhatraju E, Iles-Shih M, Enzian L, Dhanireddy S. Evaluation of Bundled  
16 Interventions for Patients With Opioid Use Disorder Experiencing Homelessness Receiving Extended  
17 Antibiotics for Severe Infection. *Open Forum Infect Dis* [Internet]. 2021;8:ofab285. Available from:  
18 <https://doi.org/10.1093/ofid/ofab285>
- 19 42. O’Connell MJ, Flanagan EH, Delphin-Rittmon ME, Davidson L. Enhancing outcomes for persons  
20 with co-occurring disorders through skills training and peer recovery support. *Journal of Mental Health*  
21 [Internet]. Routledge; 2020;29:6–11. Available from: <https://doi.org/10.1080/09638237.2017.1294733>
- 22 43. Rochat S, Wietlisbach V, Burnand B, Landry U, Yersin B. Success of Referral for Alcohol Dependent  
23 Patients from a General Hospital. *Subst Abus* [Internet]. Taylor & Francis; 2004;25:9–15. Available  
24 from: [https://doi.org/10.1300/J465v25n01\\_03](https://doi.org/10.1300/J465v25n01_03)
- 25 44. Kmiec J, Suffoletto B. Implementations of a text-message intervention to increase linkage from the  
26 emergency department to outpatient treatment for substance use disorders. *J Subst Abuse Treat* [Internet].  
27 Elsevier; 2019;100:39–44. Available from: <https://doi.org/10.1016/j.jsat.2019.02.005>
- 28 45. Sorensen JL, Masson CL, Delucchi K, Sporer K, Barnett PG, Mitsuishi F, et al. Randomized Trial of  
29 Drug Abuse Treatment-Linkage Strategies. *J Consult Clin Psychol*. 2005;73:1026–35.
- 30 46. Watson DP, Weathers T, McGuire A, Cohen A, Huynh P, Bowes C, et al. Evaluation of an emergency  
31 department-based opioid overdose survivor intervention: Difference-in-difference analysis of electronic  
32 health record data to assess key outcomes. *Drug Alcohol Depend* [Internet]. 2021;221:108595. Available  
33 from: <https://www.sciencedirect.com/science/article/pii/S0376871621000909>

- 1 47. D’Onofrio G, Chawarski MC, O’Connor PG, Pantalon M V, Busch SH, Owens PH, et al. Emergency  
2 Department-Initiated Buprenorphine for Opioid Dependence with Continuation in Primary Care:  
3 Outcomes During and After Intervention. *J Gen Intern Med* [Internet]. 2017;32:660–6. Available from:  
4 <https://doi.org/10.1007/s11606-017-3993-2>
- 5 48. Roncero C, Rodríguez-Cintas L, Barral C, Fuste G, Daigre C, Ramos-Quiroga J, et al. Treatment  
6 adherence to treatment in substance users referred from Psychiatric Emergency service to outpatient  
7 treatment. *Actas Esp Psiquiatr*. 2012;40:63–9.
- 8 49. Hu T, Snider-Adler M, Nijmeh L, Pyle A. Buprenorphine/naloxone induction in a Canadian  
9 emergency department with rapid access to community-based addictions providers. *CJEM* [Internet].  
10 2019/04/22. Cambridge University Press; 2019;21:492–8. Available from:  
11 [https://www.cambridge.org/core/article/buprenorphinenaloxone-induction-in-a-canadian-emergency-](https://www.cambridge.org/core/article/buprenorphinenaloxone-induction-in-a-canadian-emergency-department-with-rapid-access-to-communitybased-addictions-providers/483A0FF838D46580502CDBC4B00625E8)  
12 [department-with-rapid-access-to-communitybased-addictions-](https://www.cambridge.org/core/article/buprenorphinenaloxone-induction-in-a-canadian-emergency-department-with-rapid-access-to-communitybased-addictions-providers/483A0FF838D46580502CDBC4B00625E8)  
13 [providers/483A0FF838D46580502CDBC4B00625E8](https://www.cambridge.org/core/article/buprenorphinenaloxone-induction-in-a-canadian-emergency-department-with-rapid-access-to-communitybased-addictions-providers/483A0FF838D46580502CDBC4B00625E8)
- 14 50. Duber HC, Barata IA, Cioè-Peña E, Liang SY, Ketcham E, Macias-Konstantopoulos W, et al.  
15 Identification, Management, and Transition of Care for Patients With Opioid Use Disorder in the  
16 Emergency Department. *Ann Emerg Med* [Internet]. *Ann Emerg Med*; 2018 [cited 2023 Mar 13];72:420–  
17 31. Available from: <https://pubmed.ncbi.nlm.nih.gov/29880438/>
- 18 51. Chen Y, Wang Y, Nielsen S, Kuhn L, Lam T. A systematic review of opioid overdose interventions  
19 delivered within emergency departments. *Drug Alcohol Depend* [Internet]. *Drug Alcohol Depend*; 2020  
20 [cited 2023 Mar 13];213. Available from: <https://pubmed.ncbi.nlm.nih.gov/32580113/>
- 21 52. Calcaterra SL, Martin M, Bottner R, Englander H, Weinstein Z, Weimer MB, et al. Management of  
22 opioid use disorder and associated conditions among hospitalized adults: A Consensus Statement from the  
23 Society of Hospital Medicine. *J Hosp Med* [Internet]. John Wiley & Sons, Ltd; 2022 [cited 2023 Mar  
24 2];17:744–56. Available from: <https://onlinelibrary.wiley.com/doi/full/10.1002/jhm.12893>
- 25 53. Fanucchi L, Lofwall MR. Putting Parity into Practice — Integrating Opioid-Use Disorder Treatment  
26 into the Hospital Setting. *New England Journal of Medicine* [Internet]. *New England Journal of Medicine*  
27 (NEJM/MMS); 2016 [cited 2023 Mar 13];375:811–3. Available from:  
28 <https://www.nejm.org/doi/full/10.1056/NEJMp1606157>
- 29 54. SAMHSA. Use of Medication-Assisted Treatment in Emergency Departments | [Internet]. SAMHSA  
30 Publications and Digital Products. 2021 [cited 2023 Mar 13]. Available from:  
31 <https://store.samhsa.gov/product/use-of-mat-in-emergency-departments/pep21-pl-guide-5>
- 32 55. FACT SHEET: Addressing Addiction and the Overdose Epidemic | The White House [Internet].  
33 [cited 2023 Mar 13]. Available from: [https://www.whitehouse.gov/briefing-room/statements-](https://www.whitehouse.gov/briefing-room/statements-releases/2022/03/01/fact-sheet-addressing-addiction-and-the-overdose-epidemic/)  
34 [releases/2022/03/01/fact-sheet-addressing-addiction-and-the-overdose-epidemic/](https://www.whitehouse.gov/briefing-room/statements-releases/2022/03/01/fact-sheet-addressing-addiction-and-the-overdose-epidemic/)

- 1 56. Krawczyk N, Jordan A, Cerdá M. Optimizing Opioid Settlement Funds To Save Lives: Investing In  
2 Equitable Solutions. *Health Affairs Forefront* [Internet]. [cited 2023 Mar 13]; Available from:  
3 <https://www.healthaffairs.org/doi/10.1377/forefront.20230210.535750/full/>
- 4 57. Faherty LJ, Hadland SE, Stein BD, Patrick SW. Multiplying the Impact of Opioid Settlement Funds  
5 by Investing in Primary Prevention. *J Hosp Med* [Internet]. Frontline Medical Communications; 2020  
6 [cited 2023 Mar 13];15:625. Available from: [/pmc/articles/PMC7531941/](https://pubmed.ncbi.nlm.nih.gov/3531941/)
- 7 58. Englander H, Weimer M, Solotaroff R, Nicolaidis C, Chan B, Velez C, et al. Planning and Designing  
8 the Improving Addiction Care Team (IMPACT) for Hospitalized Adults with Substance Use Disorder. *J*  
9 *Hosp Med* [Internet]. *J Hosp Med*; 2017 [cited 2022 Feb 5];12:339–42. Available from:  
10 <https://pubmed.ncbi.nlm.nih.gov/28459904/>
- 11 59. Kansagara D, Chiovaro JC, Kagen D, Jencks S, Rhyne K, O’Neil M, et al. So many options, where do  
12 we start? An overview of the care transitions literature. *J Hosp Med*. John Wiley and Sons Inc.;  
13 2016;11:221–30.
- 14 60. Vendetti J, Gmyrek A, Damon D, Singh M, McRee B, Del Boca F. Screening, brief intervention and  
15 referral to treatment (SBIRT): implementation barriers, facilitators and model migration. *Addiction*  
16 [Internet]. John Wiley & Sons, Ltd; 2017 [cited 2023 Feb 28];112:23–33. Available from:  
17 <https://onlinelibrary.wiley.com/doi/full/10.1111/add.13652>
- 18 61. Fockele CE, Duber HC, Finegood B, Morse SC, Whiteside LK. Improving transitions of care for  
19 patients initiated on buprenorphine for opioid use disorder from the emergency departments in King  
20 County, Washington. *J Am Coll Emerg Physicians Open* [Internet]. Wiley; 2021 [cited 2021 Apr  
21 24];2:e12408. Available from: <https://onlinelibrary.wiley.com/doi/10.1002/emp2.12408>
- 22 62. Collins AB, Beaudoin FL, Samuels EA, Wightman R, Baird J. Facilitators and barriers to post-  
23 overdose service delivery in Rhode Island emergency departments: A qualitative evaluation. *J Subst*  
24 *Abuse Treat*. Pergamon; 2021;130:108411.
- 25 63. Upadhyaya A, Marks LR, Schwarz ES, Liang SY, Durkin MJ, Liss DB. Care cascade for patients  
26 with opioid use disorder and serious injection related infections. *Toxicol Commun*. Informa UK Limited;  
27 2021;5:6–10.
- 28 64. Prieto JT, McEwen D, Davidson AJ, Al-Tayyib A, Gawenus L, Papagari Sangareddy SR, et al.  
29 Monitoring opioid addiction and treatment: Do you know if your population is engaged? *Drug Alcohol*  
30 *Depend*. Elsevier; 2019;202:56–60.
- 31 65. Englander H, Wilson T, Collins D, Phoutrides E, Weimer M, Korthuis PT, et al. Lessons learned from  
32 the implementation of a medically enhanced residential treatment (MERT) model integrating intravenous  
33 antibiotics and residential addiction treatment. *new pub: SAGE* [Internet]. Taylor & Francis; 2018 [cited



- 1 2023 Mar 2];39:225–32. Available from:  
2 <https://www.tandfonline.com/doi/abs/10.1080/08897077.2018.1452326>
- 3 66. Wakeman SE, McGovern S, Kehoe L, Kane MT, Powell EA, Casey SK, et al. Predictors of  
4 engagement and retention in care at a low-threshold substance use disorder bridge clinic. *J Subst Abuse*  
5 *Treat. Pergamon*; 2022;141:108848.
- 6 67. Jennings LK, Lane S, McCauley J, Moreland A, Hartwell K, Haynes L, et al. Retention in Treatment  
7 after Emergency Department-Initiated Buprenorphine. *J Emerg Med. Elsevier*; 2021;61:211–21.
- 8 68. Martin A, Butler K, Chavez T, Herring A, Wakeman S, Hayes BD, et al. Integrating Emergency Care  
9 with Population Health Title Beyond Buprenorphine: Models of Follow-up Care for Patients with Opioid  
10 Use Disorder in the ED Publication Date License Beyond Buprenorphine: Models of Follow-up Care for  
11 Opioid Use Disorder in the Emergency Department. *Western Journal of Emergency Medicine: Integrating*  
12 *Emergency Care with Population Health*. 21.
- 13 69. Whiteside LK, D’Onofrio G, Fiellin DA, Edelman EJ, Richardson L, O’Connor P, et al. Models for  
14 Implementing Emergency Department–Initiated Buprenorphine With Referral for Ongoing Medication  
15 Treatment at Emergency Department Discharge in Diverse Academic Centers. *Ann Emerg Med. Mosby*;  
16 2022;80:410–9.
- 17 70. Lindenfeld Z, Franz B, Cronin C, Chang JE. Hospital adoption of harm reduction and risk education  
18 strategies to address substance use disorders. <https://doi.org/10.1080/0095299020232169832> [Internet].  
19 Taylor & Francis; 2023 [cited 2023 Mar 27]; Available from:  
20 <https://www.tandfonline.com/doi/abs/10.1080/00952990.2023.2169832>  
21  
22

1 **Declarations**

2

3 *Ethics approval and consent to participate*

4 Not applicable.

5

6 *Consent for publication*

7 Not applicable.

8

9 *Availability of data and materials*

10 Not applicable.

11

12 *Competing interests*

13 Noa Krawczyk receives funds for expert testimony in ongoing opioid litigation.

14

15 *Funding*

16 Research reported in this publication was supported by the National Institute On Drug Abuse of  
17 the National Institutes of Health under Award Numbers K01DA055758 and R34DA055228. The  
18 content is solely the responsibility of the authors and does not necessarily represent the official  
19 views of the National Institutes of Health.

20

21 *Authors' contributions*

22 NK conceptualized the research study, conducted analysis of transition strategies and drafted the  
23 manuscript. BDR and MG led the database search, extracted data, drafted findings and edited the  
24 manuscript. YHC and SN screened studies for inclusion, extracted data, and edited the  
25 manuscript. JC, HE, and JM helped conceptualize the study, informed and contributed to  
26 analysis of transition strategies, and edited the manuscript.

27

28 *Acknowledgements*

29 Authors thank Timothy Roberts from the NYU Health Sciences Library for his assistance in  
30 forming the initial search strategy for the scoping review.

31

32 *Authors' information (optional)*

**Figure 1:** Conceptual Framework: The 'Black Box' of SUD Transition Strategies

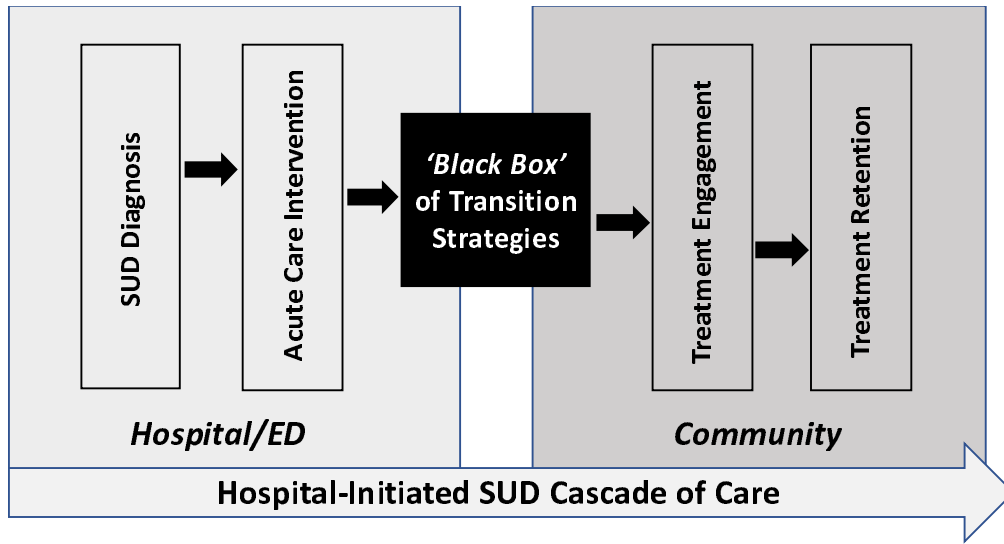

**Notes:** SUD=Substance Use Disorders, ED=Emergency Department. Cascade of Care framework adapted from Williams et al. (2019) [14].

**Figure 2:** PRISMA diagram of study selection process

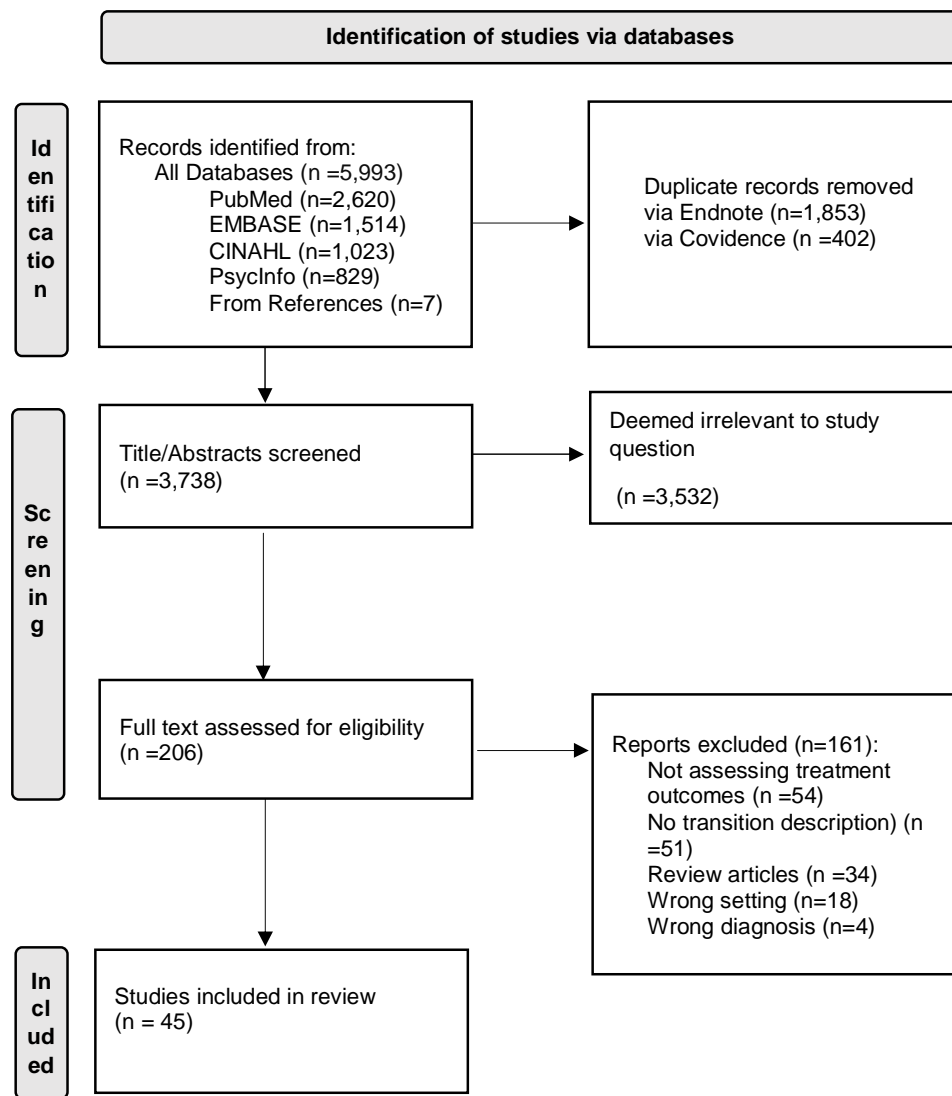

Adapted From: Page MJ, McKenzie JE, Bossuyt PM, Boutron I, Hoffmann TC, Mulrow CD, et al. The PRISMA 2020 statement: an updated guideline for reporting systematic reviews. *BMJ* 2021;372:n71. doi: 10.1136/bmj.n71 For more information, visit: <http://www.prisma-statement.org/>

**Table 1:** Setting, target population and outcomes/study design by intervention setting

|                                                             | <b>Overall n(%)<br/>N=45 (100%)</b> | <b>ED n(%)<br/>N=28 (62%)<sup>a</sup></b> | <b>Hospital n(%)<br/>N=20 (44%)<sup>a</sup></b> |
|-------------------------------------------------------------|-------------------------------------|-------------------------------------------|-------------------------------------------------|
| <b>Country</b>                                              |                                     |                                           |                                                 |
| United States                                               | 38 (84.4)                           | 21 (75.0)                                 | 15 (75.0)                                       |
| Canada                                                      | 4 (8.9)                             | 3 (10.7)                                  | 1 (5.0)                                         |
| Other <sup>b</sup>                                          | 3 (6.7)                             | 2 (7.1)                                   | 1 (5.0)                                         |
| <b>Study Design</b>                                         |                                     |                                           |                                                 |
| Randomized trial                                            | 10 (22.2)                           | 4 (14.3)                                  | 8 (40.0)                                        |
| Observational study                                         | 19 (42.2)                           | 14 (50.0)                                 | 5 (25.0)                                        |
| Pilot/feasibility study                                     | 16 (35.6)                           | 10 (35.7)                                 | 7 (35.0)                                        |
| <b>Substance use Disorder/s Addressed<sup>c</sup></b>       |                                     |                                           |                                                 |
| Substance use disorder (general)                            | 14 (31.1)                           | 10 (35.7)                                 | 5 (25.0)                                        |
| Opioid use disorder                                         | 32 (71.1)                           | 22 (78.6)                                 | 12 (60.0)                                       |
| Alcohol use disorder                                        | 15 (33.3)                           | 6 (21.4)                                  | 10 (50.0)                                       |
| Cocaine use disorder                                        | 3 (6.7)                             | 0 (0.0)                                   | 3 (15.0)                                        |
| Methamphetamine use disorder                                | 2 (4.4)                             | 0 (0.0)                                   | 2 (10.0)                                        |
| Sedative use disorder                                       | 2 (4.4)                             | 2 (7.1)                                   | 0 (0.0)                                         |
| <b>SUD Treatment Outcome/s Measured<sup>c</sup></b>         |                                     |                                           |                                                 |
| Community SUD treatment visit post-discharge                | 28 (62.2.0)                         | 23 (82.1)                                 | 9 (45.0)                                        |
| Time to first community SUD treatment visit                 | 3 (6.7)                             | 2 (7.1)                                   | 1 (5.0)                                         |
| Retention/length of engagement in SUD treatment             | 30 (66.7)                           | 17 (60.7)                                 | 14 (70.0)                                       |
| <b>Data Sources Used to Ascertain Outcomes<sup>c</sup></b>  |                                     |                                           |                                                 |
| <i>Active Data Collection</i>                               |                                     |                                           |                                                 |
| Data collected from community treatment clinic              | 9 (20.0)                            | 5 (17.9)                                  | 4 (20.0)                                        |
| Data collected via follow up up with patients               | 6 (13.3)                            | 2 (7.1)                                   | 4 (20.0)                                        |
| Data collected via unspecified source                       | 14 (31.1)                           | 9 (32.1)                                  | 8 (40.0)                                        |
| <i>Passive Data Collection</i>                              |                                     |                                           |                                                 |
| Data ascertained via Electronic Health Record               | 23 (51.1)                           | 16 (57.1)                                 | 7 (35.0)                                        |
| Data ascertained via Prescription Drug Monitoring Programs  | 2 (4.4)                             | 2 (7.1)                                   | 0 (0.0)                                         |
| Data ascertained via Medicaid claims                        | 1 (2.2)                             | 0 (0.0)                                   | 1 (5.0)                                         |
| Data ascertained via other administrative data <sup>d</sup> | 3 (6.7)                             | 3 (10.7)                                  | 0 (0.0)                                         |

Note: ED=Emergency Department, SUD=Substance Use Disorder,

<sup>a</sup> Three studies included patients from both the ED and inpatient setting

<sup>b</sup> Other countries include Switzerland (1), Spain (1), Denmark (1)

<sup>c</sup> Not mutually exclusive, will not add to 100%

<sup>d</sup>Other administrative data includes trauma registries, behavioral health databases

| <b>Table 2: Typology of Transition Strategies Identified in the Literature</b> |                                                                                                                                                                                                         |                                                                                                                                                                                                                                      |
|--------------------------------------------------------------------------------|---------------------------------------------------------------------------------------------------------------------------------------------------------------------------------------------------------|--------------------------------------------------------------------------------------------------------------------------------------------------------------------------------------------------------------------------------------|
| <b>Strategy</b>                                                                | <b>Description</b>                                                                                                                                                                                      | <b>Example from literature</b>                                                                                                                                                                                                       |
| <b><i>Pre-Discharge Transition Strategies</i></b>                              |                                                                                                                                                                                                         |                                                                                                                                                                                                                                      |
| Discuss Treatment Options                                                      | Patient interest or readiness for treatment and potential care options are discussed prior to discharge                                                                                                 | Peer recovery coaches provided brief interventions to determine treatment motivation among patients in the ED (Monico, 2020).                                                                                                        |
| Schedule Appointment                                                           | Patient has an appointment scheduled with a specific treatment provider prior to discharge (includes transitions described as a “warm handoff”)                                                         | Patients in the ED were scheduled a follow-up appointment for community-based treatment within 24-72 hours (Jennings, 2021).                                                                                                         |
| Provider List                                                                  | Patient is provided with a contact list of treatment providers prior to discharge                                                                                                                       | Research staff offered hospital patients a list of local OUD treatment centers to which they could self-refer (Cushman, 2016).                                                                                                       |
| Electronic Referral                                                            | Patient referral sent electronically to community treatment provider prior to discharge (e.g. via EHR, fax)                                                                                             | ED physicians placed electronic referral orders to an affiliated treatment clinic (Shaw, 2020).                                                                                                                                      |
| General Linkage to Treatment                                                   | Patient linked or referred to community treatment provider prior to discharge, but no specific details are provided as to how linkage is made                                                           | Addiction consult service social workers linked hospital patients to outpatient counseling, intensive outpatient programs, opioid treatment programs, and outpatient-based opioid treatment programs (Calcaterra, 2021).             |
| <b><i>Post-Discharge Transition Strategies</i></b>                             |                                                                                                                                                                                                         |                                                                                                                                                                                                                                      |
| Bridge Prescription                                                            | Patient provided with a “bridge” medication supply (e.g. of buprenorphine) or outpatient prescription following discharge                                                                               | ED patients were discharged with instructions for MOUD initiation and a buprenorphine prescription to bridge care until their community intake appointment (Kelly, 2020).                                                            |
| Transportation Assistance                                                      | Patient provided with transportation assistance following discharge to facilitate access to community treatment                                                                                         | Following hospital discharge, patients received transportation vouchers to assist them in attending outpatient appointments (O’Connell, 2020).                                                                                       |
| Follow Up Calls/Texts                                                          | Patient receives post-discharge check-in calls or texts to remind, schedule, or encourage engagement in community treatment                                                                             | Following hospital discharge, patient engagement specialists called patients within 48 hours after their scheduled community treatment appointment to confirm they attended (Pecoraro, 2012).                                        |
| Peer Support                                                                   | Patient is linked with individual or group peer-based resources to encourage engagement in community treatment                                                                                          | Following hospitalization, recovery coaches engage in motivational interviewing, provide coping strategies, and offer emotional, social, and familial support to patients. (Byrne, 2020).                                            |
| Care Navigation                                                                | Patient is linked with a care navigator that delivers case management and care coordination following discharge to facilitate access to community treatment as well as other health and social services | Upon discharge from hospital, patient navigators met with patients to deliver services such as barrier resolution, motivational interventions, advocacy with providers, and linkage to resources for basic needs (Gryczynski, 2021). |

Note: ED=Emergency Department, OUD=Opioid Use Disorder, EHR=Electronic Health Record, MOUD=Medications for Opioid Use Disorder

**Figure 3:** Frequency of strategies described across included interventions categorized as (A) pre-discharge strategies and (B) post-discharge strategies in ED interventions (n=28), and (C) pre-discharge and (D) post-discharge strategies in inpatient hospital interventions (n=20)

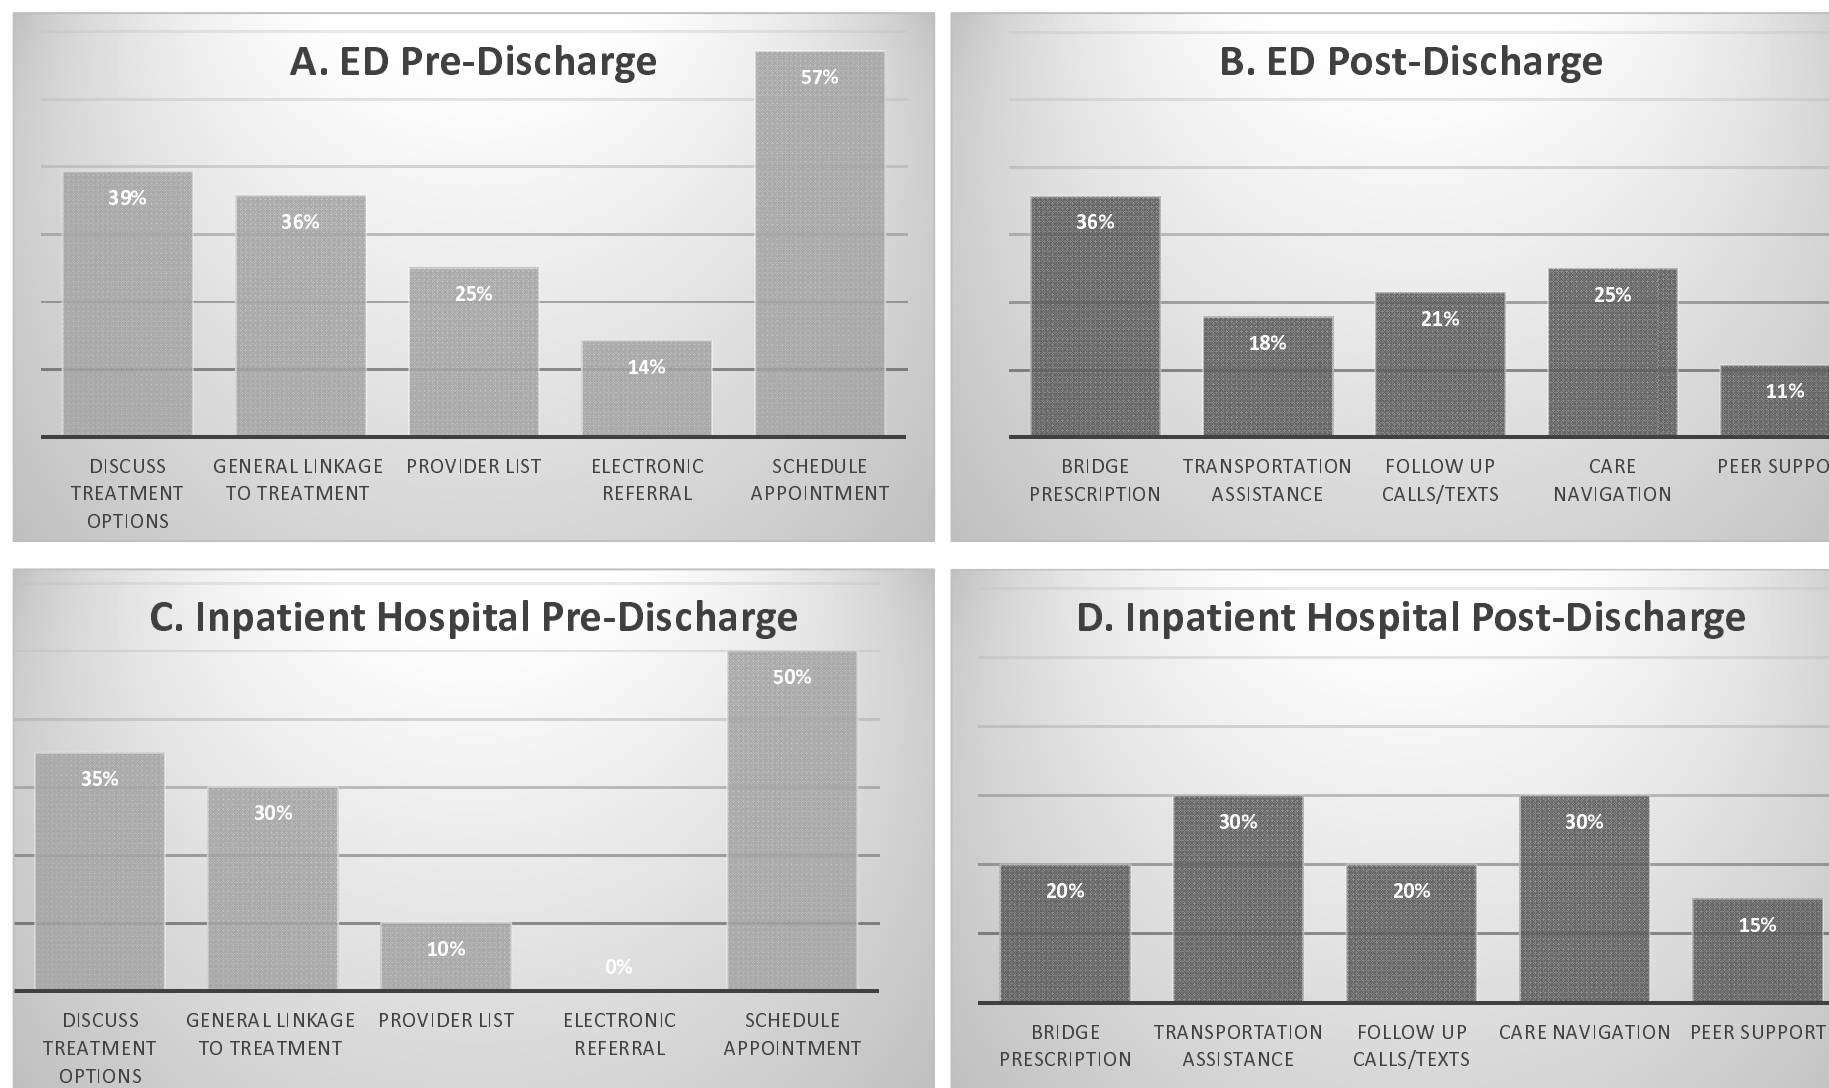

Note: Strategies are not mutually exclusive across studies

**Table 3:** Components of intervention during acute care, transition, and community treatment phases

| Components of Intervention                                   |                                                              | Overall<br>N=45 (100%) | ED<br>N=28 (62%) <sup>a</sup> | Hospital<br>N=20 (44%) <sup>a</sup> |
|--------------------------------------------------------------|--------------------------------------------------------------|------------------------|-------------------------------|-------------------------------------|
| Acute Care Phase                                             | <b>Staff Involved in Acute Care Intervention<sup>b</sup></b> |                        |                               |                                     |
|                                                              | Multidisciplinary addiction care team                        | 11 (24.4)              | 4 (14.3)                      | 9 (45.0)                            |
|                                                              | Nurse                                                        | 10 (22.2)              | 6 (21.4)                      | 3 (15.0)                            |
|                                                              | Social worker/case manager                                   | 10 (22.2)              | 4 (14.3)                      | 7 (35.0)                            |
|                                                              | Patient navigator                                            | 5 (11.1)               | 4 (14.3)                      | 1 (5.0)                             |
|                                                              | Addiction counselor                                          | 6 (13.3)               | 4 (14.3)                      | 3 (15.0)                            |
|                                                              | Peer                                                         | 3 (6.7)                | 2 (7.1)                       | 2 (10.0)                            |
|                                                              | Medical doctor                                               | 22 (48.9)              | 11 (39.3)                     | 12 (60.0)                           |
|                                                              | Nurse practitioner or physician's assistant                  | 4 (8.9)                | 2 (7.1)                       | 2 (10.0)                            |
|                                                              | Other <sup>c</sup>                                           | 3 (6.7)                | 3 (10.7)                      | 2 (10.0)                            |
|                                                              | Not specified                                                | 11 (24.4)              | 9 (32.1)                      | 1 (5.0)                             |
|                                                              | <b>Location of Acute Care Staff</b>                          |                        |                               |                                     |
|                                                              | Work directly in ED/Hospital unit                            | 34 (75.6)              | 24 (85.7)                     | 12 (60.0)                           |
|                                                              | Called upon as a part of a hospital consult team             | 5 (11.1)               | 1 (3.6)                       | 5 (25.0)                            |
|                                                              | Not specified                                                | 6 (13.3)               | 3 (10.7)                      | 3 (15.0)                            |
|                                                              | <b>Medication Initiation Offered<sup>b</sup></b>             |                        |                               |                                     |
|                                                              | Buprenorphine                                                | 26 (57.8)              | 16 (57.1)                     | 11 (55.0)                           |
|                                                              | Methadone                                                    | 10 (22.2)              | 1 (3.6)                       | 10 (50.0)                           |
|                                                              | Naltrexone                                                   | 6 (13.3)               | 1 (3.6)                       | 5 (25.0)                            |
|                                                              | Pharmacotherapy (unspecified)                                | 1 (2.2)                | 0 (0.0)                       | 1 (5.0)                             |
| None                                                         | 14 (31.1)                                                    | 9 (32.1)               | 6 (30.0)                      |                                     |
| <b>Brief Interventions Involved</b>                          |                                                              |                        |                               |                                     |
| Screening, Brief Intervention, Referral to Treatment (SBIRT) | 7 (15.6)                                                     | 5 (17.9)               | 2 (10.0)                      |                                     |
| Other Brief Intervention                                     | 4 (8.9)                                                      | 4 (14.3)               | 0 (0.0)                       |                                     |
| Transition Phase                                             | <b>Staff Involved in Facilitating Transition<sup>b</sup></b> |                        |                               |                                     |
|                                                              | Multidisciplinary addiction care team                        | 4 (8.9)                | 2 (7.1)                       | 2 (10.0)                            |
|                                                              | Nurse                                                        | 11 (24.4)              | 7 (25.0)                      | 4 (20.0)                            |
|                                                              | Social Worker/case manager                                   | 15 (33.3)              | 6 (21.4)                      | 10 (50.0)                           |
|                                                              | Patient navigator                                            | 5 (11.1)               | 3 (10.7)                      | 2 (10.0)                            |
|                                                              | Addiction counselor                                          | 5 (11.1)               | 3 (10.7)                      | 5 (25.0)                            |
|                                                              | Peer                                                         | 11 (24.4)              | 6 (21.4)                      | 5 (25.0)                            |
|                                                              | Medical doctor                                               | 25 (55.6)              | 18 (64.3)                     | 8 (40.0)                            |
|                                                              | Nurse practitioner or physician's assistant                  | 3 (6.7)                | 2 (7.1)                       | 1 (5.0)                             |
|                                                              | Research assistant                                           | 3 (6.7)                | 3 (10.7)                      | 0 (0.0)                             |
|                                                              | Other <sup>d</sup>                                           | 4 (8.9)                | 3 (10.7)                      | 2 (10.0)                            |
|                                                              | Not specified                                                | 4 (8.9)                | 4 (14.3)                      | 0 (0.0)                             |
|                                                              | <b>Location of Transition Staff</b>                          |                        |                               |                                     |
| Work directly in the ED/Hospital unit                        | 33 (73.3)                                                    | 23 (82.1)              | 10 (50.0)                     |                                     |
| Employed by external organization/research team              | 9 (20.0)                                                     | 4 (14.3)               | 7 (35.0)                      |                                     |
| Called upon as a part of a hospital consult team             | 4 (8.9)                                                      | 1 (3.6)                | 3 (15.0)                      |                                     |



| Components of Intervention                   |                                                          | Overall<br>N=45 (100%) | ED<br>N=28 (62%) <sup>a</sup> | Hospital<br>N=20 (44%) <sup>a</sup> |
|----------------------------------------------|----------------------------------------------------------|------------------------|-------------------------------|-------------------------------------|
| Community Treatment Phase                    | <b>SUD Services Patients Transitioned To<sup>b</sup></b> |                        |                               |                                     |
|                                              | SUD treatment providers (general)                        | 26 (57.8)              | 12 (42.9)                     | 14 (70.0)                           |
|                                              | Treatment with MOUD                                      | 26 (57.8)              | 17 (60.7)                     | 11 (55.0)                           |
|                                              | Primary care provider                                    | 5 (11.1)               | 4 (14.3)                      | 1 (5.0)                             |
|                                              | Detoxification program                                   | 4 (8.9)                | 3 (10.7)                      | 3 (15.0)                            |
|                                              | Residential treatment program                            | 8 (17.8)               | 4 (14.3)                      | 5 (25.0)                            |
|                                              | Bridge or other short-term clinic                        | 7 (15.6)               | 4 (14.3)                      | 3 (15.0)                            |
|                                              | Peer support/self-help groups                            | 3 (6.7)                | 1 (3.6)                       | 3 (15.0)                            |
|                                              | Other medical and mental health services <sup>c</sup>    | 6 (13.3)               | 5 (17.9)                      | 3 (15.0)                            |
|                                              | Harm reduction services                                  | 2 (4.4)                | 0 (0.0)                       | 2 (10.0)                            |
| Other community/social services <sup>e</sup> | 11 (24.4)                                                | 6 (21.4)               | 7 (35.0)                      |                                     |

Note: ED=Emergency Department, SUD=Substance Use Disorder, MOUD= Medications for Opioid Use Disorder

<sup>a</sup> Three studies included patients from both the ED and inpatient setting

<sup>b</sup> Not mutually exclusive, will not add to 100%

<sup>c</sup> Other staff involved in acute care (3) include pharmacist, clinical psychologist, and medical student

<sup>d</sup> Other staff involved in transition (4) include pharmacist, toxicologist, psychoeducator, staff from the outpatient clinic in which patients are referred

<sup>e</sup> Other medical and mental health services include care management, injury care, mental and behavioural health

<sup>f</sup> Other community/social services include transportation, legal support, educational support, familial support, domestic violence hotlines, basic needs support (housing, food, employment, insurance, clothing)
